# Supplementary material
Source: ML conference proceedings conference paper supplement (https://openreview.net/forum?id=Bi8mfzjIJ3)
Supplement: supplementary_material [file attachment]

208 **A Appendix**

209 **A.1 Representation alignment in InfoNCE with cosine similarity**

210 Pointwise mutual information (PMI) is a measurement of association that compares the probability of  
211 two events  $x$  and  $x'$  happening jointly with their probability of happening independently, defined as:

$$\text{PMI}(x, x') = \log \frac{p(x, x')}{p(x)p(x')} = \log \frac{p(x'|x)}{p(x')} \quad (4)$$

212 PMI values reflect, in log scale, the likelihood of observing  $x'$  having observed  $x$  relative to  
213 otherwise. In the case of synthetic augmentation,  $p(x'|x) \gg p(x')$  if  $x'$  is an augmentation of  $x$ ,  
214 and  $p(x'|x) = 0$  otherwise, hence  $\text{PMI}(x, x')$  is a small positive value reflective of the number of  
215 augmentations, e.g. 5, or unboundedly negative.

216

217 The InfoNCE(17) objective is optimised when representations  $z, z'$  of samples  $x, x'$  satisfy  
218  $\text{sim}(z, z') = \text{PMI}(x, x') + c(x)$ , where  $\text{sim}(\cdot)$  is the similarity function, e.g. cosine similar-  
219 ity ( $\text{sim}(z, z') = \frac{z^T z'}{\|z\|_2 \|z'\|_2}$ ), and  $c$  is a scalar that can vary with  $x$ . Use of the bounded popular  
220 cosine similarity function restricts the ability for the optimality condition to be reached, instead  
221 the optimization of this *restricted* InfoNCE objective leads to representations of similar data being  
222 aligned ( $z = z'$ ) and representations of dissimilar data being maximally dispersed.

223 **A.2 Relationship between Representations and PMI**

224 When considering why representations learned by InfoNCE are useful, which intuitively pertains to  
225 the *information* they capture, the fact that the loss function is optimised when representations satisfy  
226 a relationship to pointwise mutual *information* seems highly relevant (§2). Even more so, since an  
227 analogous relationship underpins properties of word2vec learned word embeddings (§2). However,  
228 several further observations undermine this natural line of thought:

- 229 (i) Closer approximations of mutual information do not appear to improve representations (21);
- 230 (ii) As discussed in §3.1, employing **cosine similarity**  $\text{sim}(x, x') = \frac{z^T z'}{\|z\| \|z'\|} \in [-1, 1]$  often leads to  
231 better downstream performance than using *unbounded* similarity functions, e.g. dot product,  
232 even though PMI values can fall far outside the bounded range  $[-1, 1]$ ; and
- 233 (iii) Several recent self-supervised methods take a different contrastive approach, with the aim of  
234 circumventing negative sampling, showing no clear relationship to PMI and yet perform well  
235 (1).

236 **A.3 Objective derivation**

237 Let  $\mathbf{x} = \{x^1, \dots, x^j\}$ , with  $j \leq N$ , be a set of  $N$  samples generated through augmentations, as  
238 described in section A.4. Let  $\theta = \{\theta_x, \theta_z, \pi\}$  and  $\phi = \{\phi_z, \phi_y\}$  be parameters of the model and  
239 approximate posterior, respectively. We derive the Evidence Lower Bound (ELBO) used as the  
240 SimVAE optimization objective and described in section 3.2 as:

$$\begin{aligned}
\min_{\theta} D_{\text{KL}}[p(\mathbf{x}) \parallel p_{\theta}(\mathbf{x})] &= \max_{\theta} \mathbb{E}_{\mathbf{x}} [\log p_{\theta}(\mathbf{x})] \\
&= \max_{\theta, \phi} \mathbb{E}_{\mathbf{x}} \left[ \int_{\mathbf{z}} \sum_y q_{\phi}(y, \mathbf{z} | \mathbf{x}) \log p_{\theta}(\mathbf{x}) \right] \\
&= \max_{\theta, \phi} \mathbb{E}_{\mathbf{x}} \left[ \int_{\mathbf{z}} \sum_y q_{\phi}(y, \mathbf{z} | \mathbf{x}) \log p_{\theta}(\mathbf{x}) \frac{q_{\phi}(y, \mathbf{z} | \mathbf{x})}{q_{\phi}(y, \mathbf{z} | \mathbf{x})} \right] \\
&= \max_{\theta, \phi} \mathbb{E}_{\mathbf{x}} \left[ \int_{\mathbf{z}} \sum_y q_{\phi}(y, \mathbf{z} | \mathbf{x}) \log \frac{p_{\theta_x}(\mathbf{x} | \mathbf{z}) p_{\theta_z}(\mathbf{z} | y) p_{\pi}(y)}{p_{\theta}(y, \mathbf{z} | \mathbf{x})} \frac{q_{\phi}(y, \mathbf{z} | \mathbf{x})}{q_{\phi}(y, \mathbf{z} | \mathbf{x})} \right] \\
&= \max_{\theta, \phi} \mathbb{E}_{\mathbf{x}} \left[ \int_{\mathbf{z}} \sum_y q_{\phi}(y, \mathbf{z} | \mathbf{x}) \log \frac{p_{\theta_x}(\mathbf{x} | \mathbf{z}) p_{\theta_z}(\mathbf{z} | y) p_{\pi}(y)}{q_{\phi}(y, \mathbf{z} | \mathbf{x})} \right] + D_{\text{KL}}[q_{\phi}(y, \mathbf{z} | \mathbf{x}) \parallel p_{\theta}(y, \mathbf{z} | \mathbf{x})] \\
&\geq \max_{\theta, \phi} \mathbb{E}_{\mathbf{x}} \left[ \int_{\mathbf{z}} \sum_y q_{\phi}(y, \mathbf{z} | \mathbf{x}) \log \frac{p_{\theta_x}(\mathbf{x} | \mathbf{z}) p_{\theta_z}(\mathbf{z} | y) p_{\pi}(y)}{q_{\phi}(y, \mathbf{z} | \mathbf{x})} \right] \\
&= \max_{\theta, \phi} \mathbb{E}_{\mathbf{x}} \left[ \int_{\mathbf{z}} \sum_y q_{\phi_z}(\mathbf{z} | \mathbf{x}) p_{\phi_y}(y | \mathbf{z}) \log \frac{p_{\theta_x}(\mathbf{x} | \mathbf{z}) p_{\theta_z}(\mathbf{z} | y) p_{\pi}(y)}{q_{\phi_z}(\mathbf{z} | \mathbf{x}) q_{\phi_y}(y | \mathbf{z})} \right] \\
&= \max_{\theta, \phi} \mathbb{E}_{\mathbf{x}} \left[ \int_{\mathbf{z}} q_{\phi_z}(\mathbf{z} | \mathbf{x}) \left\{ \log \frac{p_{\theta_x}(\mathbf{x} | \mathbf{z})}{q_{\phi_z}(\mathbf{z} | \mathbf{x})} + \sum_y q_{\phi_y}(y | \mathbf{z}) \log \frac{p_{\theta_z}(\mathbf{z} | y) p_{\pi}(y)}{q_{\phi_y}(y | \mathbf{z})} \right\} \right] \\
&= \max_{\theta, \phi} \mathbb{E}_{\mathbf{x}} \underbrace{\int_{\mathbf{z}} q_{\phi_z}(\mathbf{z} | \mathbf{x}) \log p_{\theta_x}(\mathbf{x} | \mathbf{z})}_{-\text{recon}(\mathbf{x})} - \underbrace{\int_{\mathbf{z}} q_{\phi_z}(\mathbf{z} | \mathbf{x}) \log q_{\phi_z}(\mathbf{z} | \mathbf{x})}_{H_{q_{\phi}(\mathbf{z} | \mathbf{x})}} \\
&\quad + \int_{\mathbf{z}} q_{\phi_z}(\mathbf{z} | \mathbf{x}) \sum_y p_{\pi, \theta_z}(y | \mathbf{z}) \log p_{\theta_z}(\mathbf{z} | y) p_{\pi}(y)
\end{aligned}$$

241 where  $\text{recon}(\cdot)$  refers to the *reconstruction loss*,  $H$  to the entropy and  $D_{\text{KL}}$  to the KL-divergence. In  
242 the last step, we use  $\max_{\phi_y} q_{\phi_y}(y | \mathbf{z}) = p_{\pi, \theta_z}(y | \mathbf{z}) \doteq \frac{p_{\theta_z}(\mathbf{z} | y) p_{\pi}(y)}{\sum_{y'} p_{\theta_z}(\mathbf{z} | y') p_{\pi}(y')}$  using Bayes' rule since  $y$   
243 is assumed to be discrete in this case. In the setting with  $N = 2$  related samples,  $\mathbf{x} = \{x, x'\}$ , the  
244 SimVAE objective can be formulated as:

$$\begin{aligned}
\min_{\theta} D_{\text{KL}}[p(\mathbf{x}) \parallel p_{\theta}(\mathbf{x})] &\geq \max_{\theta, \phi} \mathbb{E}_{\mathbf{x}} \underbrace{\int_z q_{\phi}(z | x) \log p_{\theta_x}(x | z)}_{-\text{recon}(x)} + \underbrace{\int_{z'} q_{\phi}(z' | x') \log p_{\theta_x}(x' | z')}_{-\text{recon}(x')} \\
&\quad - \underbrace{\int_z q_{\phi}(z | x) \log q_{\phi}(z | x)}_{H_{q_{\phi}(z | x)}} - \underbrace{\int_{z'} q_{\phi}(z' | x') \log q_{\phi}(z' | x')}_{H_{q_{\phi}(z' | x')}} \\
&\quad + \int_{\mathbf{z}} q_{\phi}(\mathbf{z} | \mathbf{x}) \sum_y p_{\pi, \theta_z}(y | \mathbf{z}) \log p_{\theta_z}(\mathbf{z} | y) p_{\pi}(y)
\end{aligned}$$

245 Algorithm 1 provides an overview of the main computational steps required for the training of the  
246 SimVAE evidence lower bound detailed above.

---

**Algorithm 1** SimVAE

---

**Require:** data  $\{\mathbf{x}_k\}_{k=1}^M$ ; batch size  $N$ ; data dimension  $D$ ; augmentation set  $\mathcal{T}$ ; latent dimension  $L$ ; number of augmentations  $A$ ; encoder network  $f_\phi$ ; decoder network  $g_\theta$ ; prior variance  $\{\sigma_l^*\}_{l=1}^L$

**for** randomly sampled mini-batch  $\{\mathbf{x}_k\}_{k=1}^N$  **do**

  # augment mini-batch

$\{t_a\}_{a=1}^A \sim \mathcal{T}$ ;

$\{\mathbf{x}_k^a\}_{a=1}^A = \{t_a(\mathbf{x}_k)\}_{a=1}^A$ ;

  # forward pass :  $\mathbf{z} \sim p(\mathbf{z}|\mathbf{x})$ ,  $\tilde{\mathbf{x}} \sim p(\mathbf{x}|\mathbf{z})$

$\{(\boldsymbol{\mu}_k^a, \boldsymbol{\Sigma}_k^a) = f_\phi(\mathbf{x}_k^a)\}_{a=1}^A$ ;

247  $\{\mathbf{z}_k^a \sim \mathcal{N}(\boldsymbol{\mu}_k^a, \boldsymbol{\Sigma}_k^a)\}_{a=1}^A$ ;

$\{\tilde{\mathbf{x}}_k^a = g_\theta(\mathbf{z}_k^a)\}_{a=1}^A$ ;

  # compute & minimize loss terms

$\mathcal{L}_{\text{rec}}^k = \frac{1}{\sigma ND} \sum_{a=1}^A \sum_{d=1}^D (x_{k,d}^a - \tilde{x}_{k,d}^a)^2$

$\mathcal{L}_{\text{H}}^k = L \log(2\pi e) + \frac{1}{2} \sum_{a=1}^A \log(|\boldsymbol{\Sigma}_k^a|)$

$\boldsymbol{\mu}_k^* = \frac{1}{A} \sum_{a=1}^A \mathbf{z}_k^a$

$\mathcal{L}_{\text{prior}}^k = N + AL \log(\sqrt{2\pi}) + A \sum_{l=1}^L \log(\sigma_l^*) + \sum_{a=1}^A \sum_{l=1}^L \frac{1}{2\sigma_l^*} (z_{k,l}^a - \mu_{k,l}^*)^2$

$\min(\mathcal{L} = \frac{1}{N} \sum_{k=1}^N \mathcal{L}_{\text{rec}}^k + \mathcal{L}_{\text{H}}^k + \mathcal{L}_{\text{prior}}^k)$  w.r.t  $\phi, \theta$  by SGD;

**end for**

**return**  $\phi, \theta$ ;

---

248 **A.4 Experimental Details**249 **A.4.1 Datasets**

250 **FashionMNIST** The FashionMNIST dataset (24) is a collection of 60'000 training and 10'000 test  
251 images depicting Zalando clothing items (i.e., t-shirts, trousers, pullovers, dresses, coats, sandals,  
252 shirts, sneakers, bags and ankle boots). Images were kept to their original 28x28 pixel resolution.  
253 The 10-class clothing type classification task was used for evaluation.

254 **CIFAR10** The CIFAR10 dataset (14) offers a compact dataset of 60,000 (50,000 training and 10,000  
255 testing images) small, colorful images distributed across ten categories including objects like airplanes,  
256 cats, and ships, with various lighting conditions. Images were kept to their original 32x32 pixel  
257 resolution.

258 **Celeb-A** The Celeb-A dataset (15) comprises a vast collection of celebrity facial images. It encom-  
259 passes a diverse set of 183'000 high-resolution images (i.e., 163'000 training and 20'000 test images),  
260 each depicting a distinct individual. The dataset showcases a wide range of facial attributes and poses  
261 and provides binary labels for 40 facial attributes including hair & skin color, presence or absence of  
262 attributes such as eyeglasses and facial hair. Each image was cropped and resized to a 64x64 pixel  
263 resolution. Attributes referring to hair color were aggregated into a 5-class attribute (i.e., bald, brown  
264 hair, blond hair, gray hair, black hair). Images with missing or ambiguous hair color information  
265 were discarded at evaluation.

266 All datasets were sourced from Pytorch's dataset collection.

267 **A.4.2 Data augmentation strategy**

268 Taking inspiration from SimCLR's (3) augmentation strategy which highlights the importance of ran-  
269 dom image cropping and color jitter on downstream performance, our augmentation strategy includes  
270 random image cropping, random image flipping and random color jitter. The color augmentations are  
271 only applied to the non gray-scale datasets (i.e., CIFAR10 (14) & Celeb-A dataset (15)). Due to the  
272 varying complexity of the datasets we explored, hyperparameters such as the cropping strength were

273 adapted to each dataset to ensure that semantically meaningful features remained after augmentation.  
 274 The augmentation strategy hyperparameters used for each dataset are detailed in table 3.

| Dataset | Crop  |            | Vertical Flip | Color Jitter |     |       |
|---------|-------|------------|---------------|--------------|-----|-------|
|         | scale | ratio      | prob.         | b-s-c        | hue | prob. |
| MNIST   | 0.4   | [0.75,1.3] | 0.5           | -            | -   | -     |
| Fashion | 0.4   | [0.75,1.3] | 0.5           | -            | -   | -     |
| CIFAR10 | 0.6   | [0.75,1.3] | 0.5           | 0.8          | 0.2 | 0.8   |
| Celeb-A | 0.6   | [0.75,1.3] | 0.5           | 0.8          | 0.2 | 0.8   |

Table 3: Data augmentation strategy for each dataset: (from left to right) cropping scale, cropping ratio, probability of vertical and horizontal flipping, brightness-saturation-contrast jitter strength, hue jitter strength, probability of color jitter

### 275 A.4.3 Training Implementation Details

276 This section contains all details regarding the architectural and optimization design choices used to  
 277 train SimVAE and all baselines. Method-specific hyperparameters are also reported below.

278 **Datasets and Evaluation Metrics** We evaluated SimVAE on three benchmark datasets including two  
 279 with natural images: FashionMNIST (24), Celeb-A (15) and CIFAR10 (14). We augment images  
 280 following the SimCLR (3) protocol which includes cropping and flipping as well as color jitter for  
 281 natural images. We evaluate representations’ utility for downstream classification tasks using a linear  
 282 probe, a non-linear MLP probe, and k-nearest neighbors (kNN) (4) trained on the pre-trained frozen  
 283 representations using image labels (3; 2). Additionally, we conducted a fully unsupervised evaluation  
 284 by fitting a Gaussian mixture model (GMM) to the frozen features for which the number of clusters  
 285 was set to its ground-truth value. Downstream performance is measured in terms of classification  
 286 accuracy (CA). A model’s generative quality was evaluated using the Fréchet Inception Distance  
 287 (FID) (9), reconstruction error as well as the Normalized Mutual Information (NMI) and Adjusted  
 288 Rank Index (ARI) clustering scores (see appendix A.5).

289 **Baselines methods** We compare SimVAE to other VAE-based models including the vanilla VAE (13),  
 290  $\beta$ -VAE (10) and CR-VAE (19), as well as to state-of-the-art self-supervised discriminative methods  
 291 including SimCLR (3), VicREG (1), and MoCo (8). As a lower bound, we also provide results  
 292 obtained for randomly initialized embeddings. To ensure fair comparison, the augmentation strategy,  
 293 representation dimensionality, batch size, and encoder-decoder architectures were kept invariant  
 294 across methods. To enable a qualitative comparison of representations, decoder networks were trained  
 295 for each discriminative baseline on top of frozen representations using the reconstruction error. See  
 296 appendices A.4.3 and A.4.4 for further details on training baselines and decoder models.

297 **Hyperparameters** We use MLP and Resnet18 (7) network architectures for simple and natural image  
 298 datasets respectively. We fix the dimension of representations  $z$  to 10 for FashionMNIST, and to 64 for  
 299 Celeb-A and CIFAR10 datasets. For all generative approaches, we adopt Gaussian posteriors, priors,  
 300 and likelihoods, employing diagonal covariance matrices as in (13). We fix covariances of the prior  
 301 and likelihood distributions and perform a hyper-parameter search. SimVAE conveniently allows for  
 302 the simultaneous incorporation of sets of related observations. After tuning, we fix the number of  
 303 augmentations to 6 (see Figure 4 for an ablation). For baselines, all sensitive hyperparameters were  
 304 tuned independently for each dataset and method.

305 **Network Architectures** The encoder network architectures used for SimCLR, MoCo, VicReg, and  
 306 VAE-based approaches including SimVAE for simple (i.e., FashionMNIST) and complex datasets  
 307 (i.e., CIFAR10, Celeb-A) are detailed in table 4a, table 5a respectively. Generative models which  
 308 include all VAE-based methods also require decoder networks for which the architectures are detailed  
 309 in table 4b and table 5b. The encoder and decoder architecture networks are kept constant across  
 310 methods including the latent dimensionality to ensure a fair comparison across methods.

311 **Optimisation & Hyper-parameter tuning** All methods were trained using an Adam optimizer until  
 312 training loss convergence. A learning rate tuning was performed for each method independently

| Layer Name | Output Size | Block Parameters  | Layer Name | Output Size | Block Parameters  |
|------------|-------------|-------------------|------------|-------------|-------------------|
| fc1        | 500         | 784x500 fc, relu  | fc1        | 2000        | 10x2000 fc, relu  |
| fc2        | 500         | 500x500 fc, relu  | fc2        | 500         | 2000x500 fc, relu |
| fc3        | 2000        | 500x2000 fc, relu | fc3        | 500         | 500x500 fc, relu  |
| fc4        | 10          | 2000x10 fc        | fc4        | 784         | 500x784 fc        |

(a) Encoder

(b) Decoder

Table 4: Multi-layer perceptron network architectures used for FashionMNIST training

| Layer Name | Output | Block Parameters                                              | Layer Name | Output  | Block Parameters                         |
|------------|--------|---------------------------------------------------------------|------------|---------|------------------------------------------|
| conv1      | 32x32  | 4x4, 16, stride 1<br>batchnorm, relu<br>3x3 maxpool, stride 2 | fc         | 256x4x4 | 64x4096 fc                               |
| conv2_x    | 32x32  | 3x3, 32, stride 1<br>3x3, 32, stride 1                        | conv1_x    | 8x8     | 3x3, 128, stride 2<br>3x3, 128, stride 1 |
| conv3_x    | 16x16  | 3x3, 64, stride 2<br>3x3, 64, stride 1                        | conv2_x    | 16x16   | 3x3, 64, stride 2<br>3x3, 64, stride 1   |
| conv4_x    | 8x8    | 3x3, 128, stride 2<br>3x3, 128, stride 1                      | conv3_x    | 32x32   | 3x3, 32, stride 2<br>3x3, 32, stride 1   |
| conv5_x    | 4x4    | 3x3, 256, stride 2<br>3x3, 256, stride 1                      | conv4_x    | 64x64   | 3x3, 16, stride 2<br>3x3, 16, stride 1   |
| fc         | 64     | 4096x64 fc                                                    | conv5      | 64x64   | 5x5, 3, stride 1                         |

(a) Encoder

(b) Decoder

Table 5: Resnet18 network architectures used for CIFAR10 &amp; Celeb-A training

313 across the range  $1e^{-3}$  to  $8e^{-5}$ . A fixed batch size of 128 was used across methods and datasets. The  
314  $\beta$ ,  $\tau$ ,  $\lambda$  parameters for the  $\beta$ -VAE, SimCLR and CRVAE methods were tuned across the  $[0.1, 0.2, 0.5]$ ,  
315  $[0.1, 0.5, 1.0]$  and  $[0.01, 0.1, 1.0]$  ranges respectively based on downstream performance.  $\beta = 0.1$ ,  
316  $\lambda = 0.01$  were selected and  $\tau = 1.0$ ,  $\tau = 0.5$  were chosen for simple and natural datasets respectively.  
317 The likelihood probability variance for VAE-based methods including SimVAE was kept to  $\sigma^2 = 1.0$   
318 and the prior probability,  $p(z|y)$ , variance parameter for SimVAE was tuned and fixed to 0.003, 0.005,  
319 0.005 for FashionMNIST, CIFAR10 and Celeb-A respectively.

#### 320 A.4.4 Evaluation Implementation Details

321 Following common practices (3), downstream performance is assessed using a linear probe, a multi-  
322 layer perceptron probe, a k-nearest neighbors (kNN) algorithm, and a Gaussian mixture model  
323 (GMM). The linear probe consists of a fully connected layer whilst the mlp probe consists of two  
324 fully connected layers with a relu activation for the intermediate layer. Both probes were trained  
325 using an Adam optimizer with a learning rate of  $3e-4$  for 200 epochs with batch size fixed to 128.  
326 Scikit-learn’s Gaussian Mixture model with a full covariance matrix and 200 initialization was fitted  
327 to the representations using the ground truth cluster number. The kNN algorithm from Python’s  
328 Scikit-learn library was used with k spanning from 1 to 15 neighbors. The best performance was  
329 chosen as the final performance measurement. No augmentation strategy was used at evaluation.

#### 330 A.4.5 Generation Protocol

331 In this section, we detail the image generation protocol as well as the evaluation of the quality of the  
332 generated samples.

333 **Ad-hoc decoder training** VAE-based approaches, including SimVAE, are fundamentally generative  
 334 methods aimed at approximating the logarithm of the marginal likelihood distribution, denoted as  
 335  $\log p(x)$ . In contrast, most traditional self-supervised methods adopt a discriminative framework  
 336 without a primary focus on accurately modeling  $p(x)$ . However, for the purpose of comparing  
 337 representations, and assessing the spectrum of features present in  $z$ , we intend to train a decoder  
 338 model for SimCLR & VicReg models. This decoder model is designed to reconstruct images from the  
 339 fixed representations initially trained with these approaches. To achieve this goal, we train decoder  
 340 networks using the parameter configurations specified in Tables 4b and 5b, utilizing the mean squared  
 341 reconstruction error as the loss function. The encoder parameters remain constant, while we update  
 342 the decoder parameters using an Adam optimizer with a learning rate of  $1e^{-4}$  until convergence is  
 343 achieved (i.e.  $\sim 200$  epochs).

344 **Conditional Image Generation** To allow for a fair comparison, all images across all methods are  
 345 generated by sampling  $z$  from a multivariate Gaussian distribution fitted to the training samples’  
 346 representations. More precisely, each Gaussian distribution is fitted to  $z$  conditioned on a label  $y$ .  
 347 Scikit-Learn Python library Gaussian Mixture model function (with full covariance matrix) is used.

## 348 A.5 Additional Results

### 349 A.5.1 Self-supervised classification

350 **Clustering metrics** Table 6 and table 7 report the normalized mutual information (NMI) and adjusted  
 351 rank index (ARI) for the fitting of a GMM to latent representations  $z$ .

| Dataset        |     | Random         | VAE            | $\beta$ -VAE   | CR-VAE         | SimVAE                           |
|----------------|-----|----------------|----------------|----------------|----------------|----------------------------------|
| <b>Fashion</b> | ARI | $28.7 \pm 0.6$ | $44.2 \pm 1.1$ | $44.7 \pm 0.2$ | $23.3 \pm 0.8$ | <b><math>55.7 \pm 0.0</math></b> |
|                | NMI | $51.5 \pm 0.2$ | $66.7 \pm 0.7$ | $66.4 \pm 0.4$ | $46.1 \pm 2.2$ | <b><math>76.8 \pm 0.2</math></b> |
| <b>Celeb-A</b> | ARI | $3.4 \pm 0.3$  | $5.7 \pm 0.2$  | $6.2 \pm 0.7$  | $6.6 \pm 0.9$  | $2.6 \pm 0.7$                    |
|                | NMI | $4.2 \pm 0.4$  | $3.9 \pm 0.2$  | $4.7 \pm 0.9$  | $5.0 \pm 0.7$  | $2.9 \pm 0.7$                    |
| <b>CIFAR10</b> | ARI | $0.09 \pm 0.0$ | $0.7 \pm 0.2$  | $0.7 \pm 0.2$  | $0.9 \pm 0.1$  | <b><math>8.6 \pm 0.3</math></b>  |
|                | NMI | $27.9 \pm 0.1$ | $17.7 \pm 0.5$ | $18.7 \pm 0.3$ | $18.9 \pm 0.1$ | <b><math>37.2 \pm 0.4</math></b> |

Table 6: Normalized mutual information (NMI) and Adjusted Rank Index (ARI) for all generative methods and datasets; Average scores and standard errors are computed across three random seeds

| Dataset        |     | MoCo           | VicReg                           | SimCLR                           |
|----------------|-----|----------------|----------------------------------|----------------------------------|
| <b>Fashion</b> | ARI | $30.9 \pm 0.5$ | $37.1 \pm 1.3$                   | <b><math>50.3 \pm 1.9</math></b> |
|                | NMI | $50.4 \pm 0.6$ | $64.5 \pm 0.7$                   | <b><math>71.2 \pm 1.0</math></b> |
| <b>Celeb-A</b> | ARI | –              | <b><math>18.7 \pm 0.8</math></b> | $0.0 \pm 0.1$                    |
|                | NMI | –              | <b><math>24.3 \pm 0.3</math></b> | $0.0 \pm 0.0$                    |
| <b>CIFAR10</b> | ARI | $27.2 \pm 1.0$ | $31.2 \pm 0.2$                   | <b><math>49.6 \pm 1.3</math></b> |
|                | NMI | $16.5 \pm 0.4$ | <b><math>53.4 \pm 0.1</math></b> | $26.9 \pm 0.8$                   |

Table 7: Normalized mutual information (NMI) and Adjusted Rank Index (ARI) for all discriminative baselines and datasets; Average scores and standard errors are computed across three random seeds

352 **Augmentation Protocol Strength** Figure 3 reports the downstream CA across methods for various  
 353 augmentations strategy. More precisely, we progressively increase the cropping scale and color jitter  
 354 amplitude. Unsurprisingly (3), discriminative methods exhibit high sensitivity to the augmentation  
 355 strategy with stronger disruption leading to improved content prediction. The opposite trend is  
 356 observed with vanilla generative methods where reduced variability amongst the data leads to  
 357 increased downstream performance. Interestingly, SimVAE is robust to augmentation protocol and  
 358 performs comparably across settings.

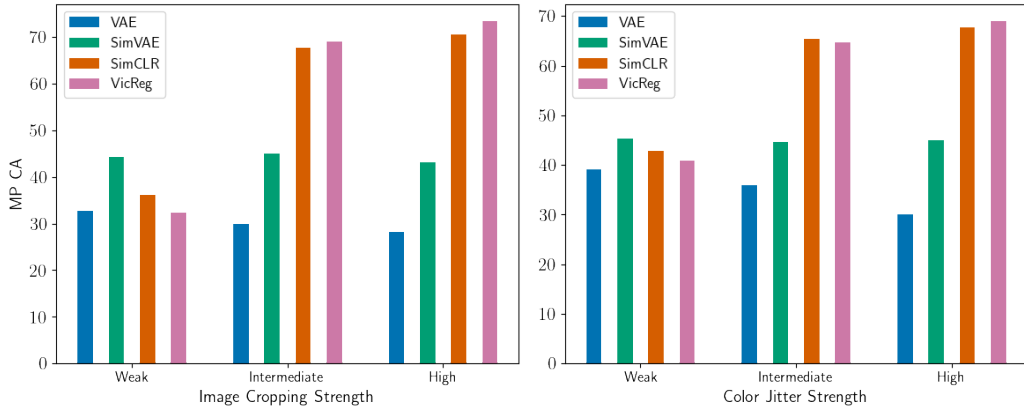

Figure 3: Ablation experiment across the number of augmentations considered during training of the SimVAE model using the MNIST (left) and FashionMNIST (right) datasets. Two, four, six and eight augmentations were considered. The average and standard deviation of the downstream classification accuracy using KNN and GMM probes are reported across three seeds.

359 **# Augmentation Ablation** Figure 4 reports the downstream classification accuracy for increasing  
 360 numbers of augmentations considered simultaneously during the training of SimVAE. A larger number  
 361 of augmentations result in a performance increase up to a certain limit (i.e., 6-8 augmentations).  
 362 Further exploration is needed to understand how larger sets of augmentations can be effectively  
 363 leveraged potentially by allowing for batch size increase.

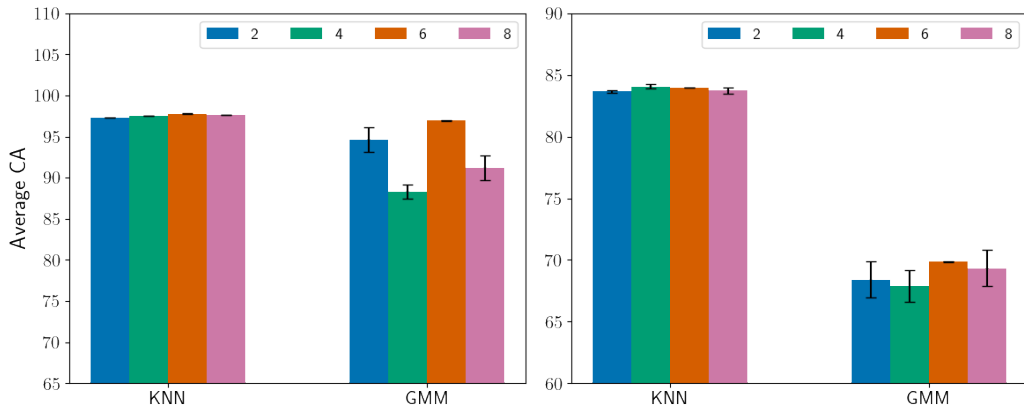

Figure 4: Ablation experiment across the number of augmentations considered during training of the SimVAE model using the MNIST (left) and FashionMNIST (right) datasets. Two, four, six and eight augmentations were considered. The average and standard deviation of the downstream classification accuracy using KNN and GMM probes are reported across three seeds. Batch size of 128 for all reported methods and number of augmentations.

### 364 A.5.2 Image Generation

365 In this section, we explore and report the quality of images generated through SimVAE and all  
 366 considered baselines through visualisations (for VAE-based approaches only) and quantitative  
 367 measurements.  
 368

369 **Generated Images** Figure 5 report examples of randomly generated images for each digit class and  
 370 clothing item using the SimVAE trained on MNIST and FashionMNIST respectively.

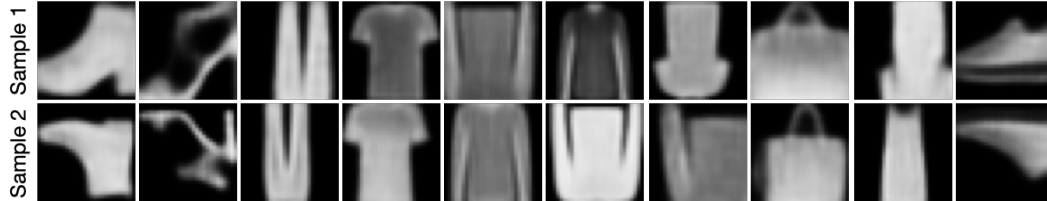

Figure 5: Conditional sampling for each one of the FashionMNIST clothing type using pre-trained SimVAE model

|         |              | RE                               | FID                               | NLL               |
|---------|--------------|----------------------------------|-----------------------------------|-------------------|
| Fashion | VAE          | $4.4 \pm 0.1$                    | $99.4 \pm 0.6$                    | $5696.5 \pm 0.1$  |
|         | $\beta$ -VAE | $4.6 \pm 0.1$                    | $99.9 \pm 0.7$                    | $5696.7 \pm 0.1$  |
|         | CR-VAE       | $4.3 \pm 0.0$                    | $98.7 \pm 0.0$                    | $5696.7 \pm 0.0$  |
|         | SimVAE       | <b><math>3.4 \pm 0.1</math></b>  | <b><math>96.1 \pm 1.0</math></b>  | $5695.6 \pm 0.0$  |
| Celeb-A | VAE          | $56.6 \pm 0.2$                   | $162.9 \pm 2.8$                   | –                 |
|         | $\beta$ -VAE | $60.3 \pm 1.0$                   | $163.8 \pm 2.3$                   | –                 |
|         | CR-VAE       | $57.4 \pm 0.1$                   | <b><math>159.3 \pm 5.4</math></b> | –                 |
|         | SimVAE       | <b><math>35.3 \pm 0.2</math></b> | <b><math>157.8 \pm 2.3</math></b> | –                 |
| CIFAR10 | VAE          | <b><math>21.4 \pm 0.2</math></b> | $365.4 \pm 3.3$                   | $22330.8 \pm 0.2$ |
|         | $\beta$ -VAE | $22.3 \pm 0.2$                   | $376.7 \pm 1.7$                   | $22327.7 \pm 0.2$ |
|         | CR-VAE       | $22.5 \pm 0.0$                   | $374.4 \pm 0.4$                   | $22327.3 \pm 0.8$ |
|         | SimVAE       | $22.1 \pm 0.1$                   | <b><math>349.9 \pm 2.1</math></b> | $22327.3 \pm 0.2$ |

Table 8: Generation quality evaluation of all generative methods across three random seeds: (from left to right) mean squared reconstruction error (RE,  $\downarrow$ ), fréchet inception distance (FID,  $\downarrow$ ), negative log-likelihood (NLL,  $\downarrow$ )

371 **Generative quality** Table 8 reports the FID scores, reconstruction error and approximate negative  
 372 log-likelihoods using 1000 importance-weighted samples for all generative baselines and SimVAE.
